# Supplementary material
Source: publisher figshare collection journal article supplement (https://acs.figshare.com/ndownloader/files/25835362)
Supplement: Supplementary file 1 [file 25835362]

## Supporting Information

# **MOF-on-MOF Membrane with Cascading Functionality for Capturing Dichromate Ions and P-arsanilic Acid Turn-on Sensing**

*Ke Zhu, Ruiqing Fan\*, Jingkun Wu, Bowen Wang, Haoyang Lu, Xubin Zheng, Tiancheng Sun, Shuang Gai, Xuesong Zhou and Yulin Yang\**

K. Zhu, Prof. R. Fan, J. Wu, H. Lu, B. Wang, X. Zheng, P. Wang and Prof. Y. Yang  
MIIT Key Laboratory of Critical Materials Technology for New Energy Conversion  
and Storage, School of Chemistry and Chemical Engineering, Harbin Institute of  
Technology, Harbin 150001, P. R. China  
E-mail: fanruiqing@hit.edu.cn and ylyang@hit.edu.cn

## Materials and Methods

All the other materials were commercially available reagents of analytical grade. Single-crystal X-ray diffraction (SC-XRD) data of **Cu(I)-tpt** and **Cu(II)-tpt** were obtained by Rigaku SCX-mini diffractometer with graphite monochromatic Mo-K $\alpha$  radiation ( $\lambda = 0.71073 \text{ \AA}$ ). Thermogravimetric analysis (TGA) was carried out on ZRY-2P thermogravimetric analyzer from 40 to 700 °C with a heating rate of 10 °C/min under air atmosphere. Powder X-ray diffraction (PXRD) pattern was obtained using Cu K $\alpha$  radiation with Shimadzu XRD-6000 X-ray diffractometer. Simulation of PXRD pattern was performed by single crystal data and diffraction crystal module of Mercury program. Scan electron microscope (SEM) image was recorded by Rili SU 8000HSD Series Hitachi New Generation Cold Field Emission. The emission properties were recorded with Edinburgh FLS 920 fluorescence spectrometer equipped with a Peltier-cooled Hamamatsu R928 photomultiplier tube. An Edinburgh Xe900 450 W xenon arc lamp was used as an exciting light source.

### Single-Crystal X-Ray Crystal Structure Determination

The X-ray diffraction data taken at room temperature for **Cu(I)-tpt** was collected on a Rigaku R-Axis RAPID IP diffractometer equipped with graphite-monochromated Mo K $\alpha$  radiation ( $\lambda = 0.71073 \text{ \AA}$ ). The structure of **Cu(I)-tpt** was solved by direct methods and refined on  $F^2$  by the full-matrix least squares using the SHELXTL-97 crystallographic software. Anisotropic thermal parameters are refined to all of the non-hydrogen atoms. The hydrogen atoms were held in calculated ideal positions on carbon atoms and nitrogen atoms in ligands. The chemical formulas were determined by the combination of single crystal data, TGA results and elemental analysis. The CCDC 1994836 and 2022584 contains the crystallographic data **Cu(I)-tpt** and **Cu(II)-tpt** of

this paper. These data can be obtained free of charge at [www.ccdc.cam.ac.uk/](http://www.ccdc.cam.ac.uk/) deposit. Crystal structure data and details of the data collection and the structure refinement are listed as Table S1 and S3, selected bond lengths and bond angles of **Cu(I)-tpt** and **Cu(II)-tpt** are listed as Table S2 and S4.

## ■ EXPERIMENTAL SECTION

### Adsorption experiments of $\text{Cr}_2\text{O}_7^{2-}$

All the tests were performed in aqueous solution, and the **Cu(II)-tpt-on-Cu(I)-tpt membrane** (2 cm × 2 cm, The average load of crystals in the membrane is 51.3±0.2 mg) was standby application. Then adsorption kinetic experiment was performed under different initial  $\text{Cr}_2\text{O}_7^{2-}$  concentrations (20, 40 and 60 mg L<sup>-1</sup>) (the total volume of solution was 200 mL and the pH value was controlled at 7). Adsorption isotherm experiment was investigated at room temperature by immersing **Cu(II)-tpt-on-Cu(I)-tpt membrane** to the solution containing  $\text{Cr}_2\text{O}_7^{2-}$  with different initial concentrations (from 0 to 100 mg L<sup>-1</sup>) (V = 200 mL and pH = 7). The effects of solution pH value on the adsorption capacity were further studied by simply putting **Cu(II)-tpt-on-Cu(I)-tpt membrane** and  $\text{Cr}_2\text{O}_7^{2-}$  into different pH solutions (from 2 to 11), which were adjusted with HCl or NaOH (the concentration of  $\text{Cr}_2\text{O}_7^{2-}$  was 100 mg L<sup>-1</sup>, respectively). After the adsorption was completed, all the solutions were taken 2 mL using a pipette. Finally, the concentration of  $\text{Cr}_2\text{O}_7^{2-}$  in the resulting solution was monitored by UV-Vis Absorption Spectrum (UV-Vis).

The adsorption capacity  $q_t$  (mg g<sup>-1</sup>) was calculated by the following equation (1) :

$$q_t = (C_0 - C_t)V/M \quad (1)$$

where  $C_0$ ,  $C_t$  and  $C_e$  mean the concentration of  $\text{Cr}_2\text{O}_7^{2-}$  at initial time, at contact time and at equilibrium ( $\text{mg L}^{-1}$ ), respectively.  $V$  is the total volume of  $\text{Cr}_2\text{O}_7^{2-}$  solution ( $\text{L}$ ).  $M$  represents the amount of **Cu(II)-tpt-on-Cu(I)-tpt** in membrane ( $\text{g}$ ).

The corresponding formulas for pseudo-first-order and pseudo-second-order model were shown as equation (2) and (3):

$$\ln(q_e - q_t) = \ln q_e - k_1 t \quad (2)$$

$$t/q_t = 1/k_2 q_e^2 + t/q_e \quad (3)$$

where  $q_t$  and  $q_e$  means the adsorption capacity of  $\text{Cr}_2\text{O}_7^{2-}$  at contact time and equilibrium ( $\text{mg g}^{-1}$ ), respectively.  $k_1$  means the rate constant of pseudo-first-order model ( $\text{min}^{-1}$ ), and  $k_2$  represents the equilibrium rate constant of pseudo-second-order equation ( $\text{g} \cdot \text{mg}^{-1} \cdot \text{min}^{-1}$ ).

The corresponding formula for Langmuir and Freundlich model were exhibited as equation (4) and (5):

$$C_e/q_e = 1/q_{\max} k_L + C_e/q_{\max} \quad (4)$$

$$\ln q_e = \ln k_F + \ln C_e/n \quad (5)$$

where  $C_e$  represents the  $\text{Cr}_2\text{O}_7^{2-}$  concentration at equilibrium ( $\text{mg L}^{-1}$ ).  $q_e$  is the adsorption capacity of  $\text{Cr}_2\text{O}_7^{2-}$  at equilibrium ( $\text{mg g}^{-1}$ ).  $q_{\max}$  means the theoretical maximum adsorption capacity ( $\text{mg g}^{-1}$ ).  $k_L$  represents the constant of Langmuir model ( $\text{L mg}^{-1}$ ).  $k_F$  and  $n$  mean the Freundlich constants.

### Sensing experiments of p-ASA

The **Cu(II)-tpt-on-Cu(I)-tpt membranes** after adsorption treatment were immersed into different concentrations of p-ASA solutions ( $5 - 150 \mu\text{g} \cdot \text{L}^{-1}$ ), and then take out it

from the p-ASA solutions. Subsequently, the fluorescence intensity of the **Cu(II)-tpt-on-Cu(I)-tpt membranes** were measured at an excitation wavelength of 340 nm. In order to verify the selectivity of **Cu(II)-tpt-on-Cu(I)-tpt membranes** for p-ASA, various common cations (such as  $K^+$ ,  $Na^+$ ,  $Zn^{2+}$  etc.), anions ( $Cl^-$ ,  $NO_3^-$ ,  $SO_4^{2-}$  etc.), organics (glucose, starch, carboxymethylcellulose sodium (NaCMC)), and some other organic-arsonic acid (p-hydroxyphenylarsonic acid (p-HPA), phenyl-arsonic acid (PAA), roxarsone (ROX)) were examined. The concentration of these substances were three times the concentration of p-ASA (the concentration of p-ASA solution was 1mM).

### Syntheses of Cu(I)-tpt

The **Cu(I)-tpt** was prepared by solvothermal method. Firstly, CuI (0.019 g, 0.10 mmol) was dissolved in  $CH_3CN$  (6 mL) solution, and then  $NH_3 \cdot H_2O$  (10  $\mu$ L) was added. After stirring for 20 minutes, adding the ligand Htpt (0.0213 mg, 0.10 mmol) and continue to stir for another 30 minutes, and finally transfer the mixed suspension to a Teflon-lined stainless steel container (20 mL), place it at 85 °C for 60 hours, and after cooling to room temperature. The colourless block-shaped crystals were obtained (yield: 84%, based on copper metal). Elemental analysis (%): calculated for  $CuN_7C_9H_6$  ( $M_r = 275.76$ ): C, 39.16; H, 2.18; N, 35.54. found: C, 38.87; H, 2.25; N, 35.53.

### Syntheses of (Cu(II)-tpt)

The **Cu(II)-tpt** was prepared by solvothermal method. Firstly,  $Cu(NO_3)_2 \cdot 3H_2O$  (0.024 g, 0.10 mmol) was dissolved in  $CH_3OH$  (6 mL) solution, and then  $HNO_3$  (10  $\mu$ L) was added. After stirring for 20 minutes, adding the ligand Htpt (0.0213 g, 0.10 mmol) and continue to stir for another 30 minutes, and finally transfer the mixed

suspension to a Teflon-lined stainless steel container (20 mL), place it at 85 °C for 3 days, and after cooling to room temperature. The blue block-shaped crystals were obtained (yield: 84%, based on copper metal). Elemental analysis (%): calculated for  $\text{CuN}_{14}\text{C}_{18}\text{OH}_{14}$  ( $M_r = 569.52$ ): C, 37.92; H, 2.46; N, 34.41. found: C, 37.87; H, 2.45; N, 34.47.

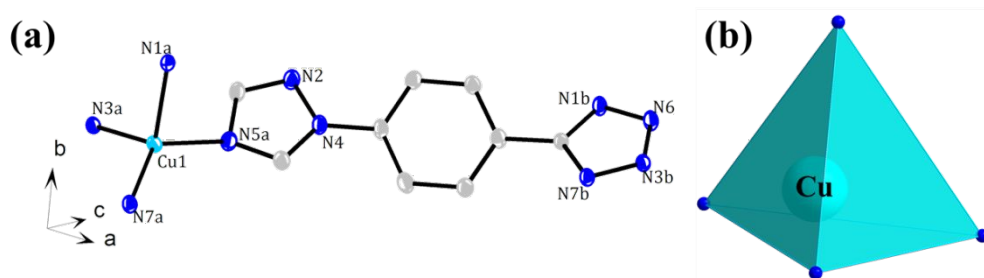

**Figure S1.** (a) Asymmetric unit of **Cu(I)-tpt** with hydrogen atoms being omitted for clarity. (b) The tetrahedral geometry of  $\text{Cu}^+$ .

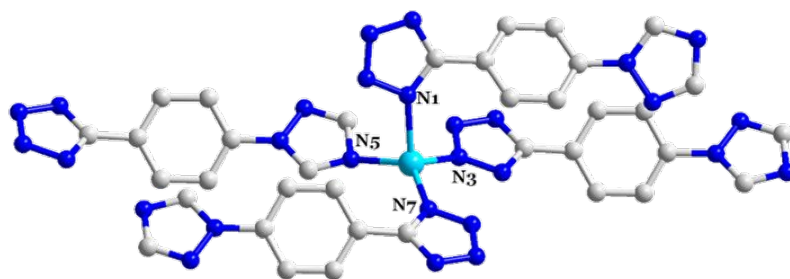

**Figure S2.** Connection mode of  $\text{Cu}^+$ .

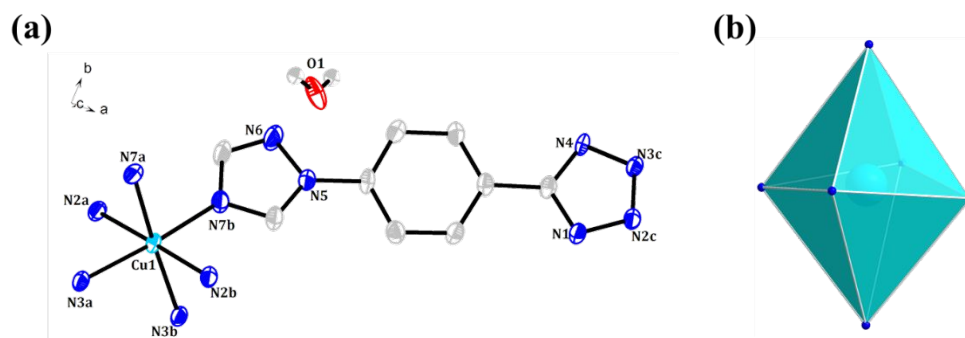

**Figure S3.** (a) Asymmetric unit of **Cu(II)-tpt** with hydrogen atoms being omitted for clarity. (b) The octahedral geometry of  $\text{Cu}^{2+}$ .

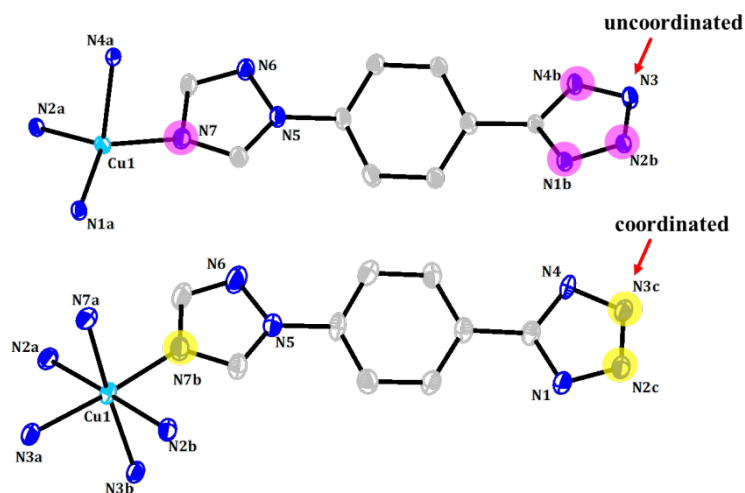

**Figure S4.** The coordination mode of **Cu(I)-tpt** and **Cu(II)-tpt**.

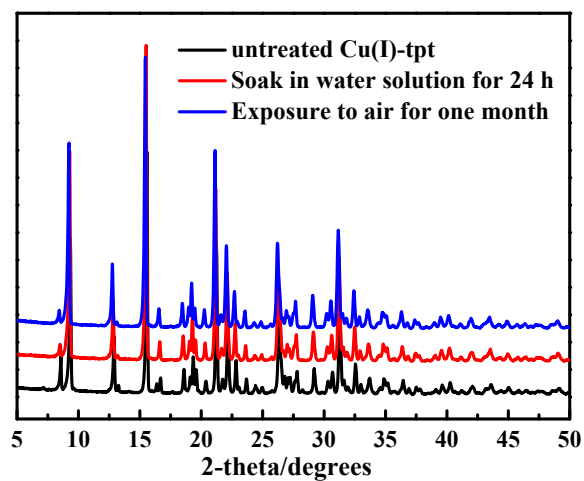

Figure S5. PXRD patterns of Cu(I)-tpt under treatment.

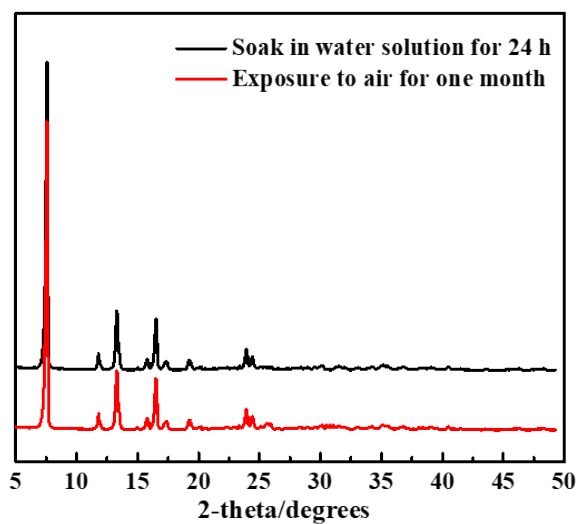

Figure S6. PXRD patterns of Cu(II)-tpt under treatment.

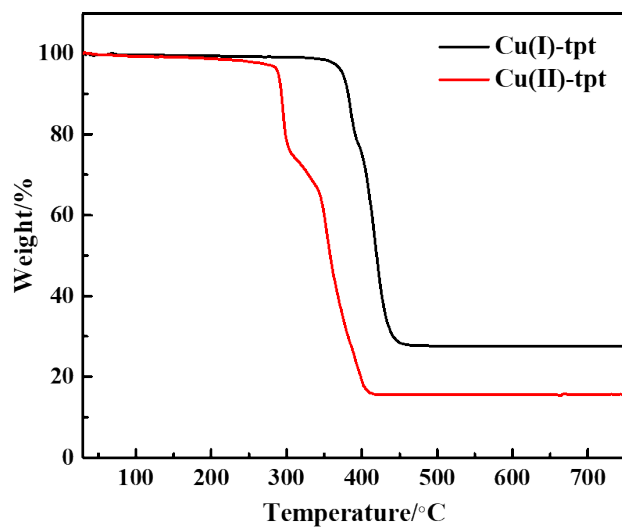

Figure S7. The TG curves of Cu(I)-tpt and Cu(II)-tpt.

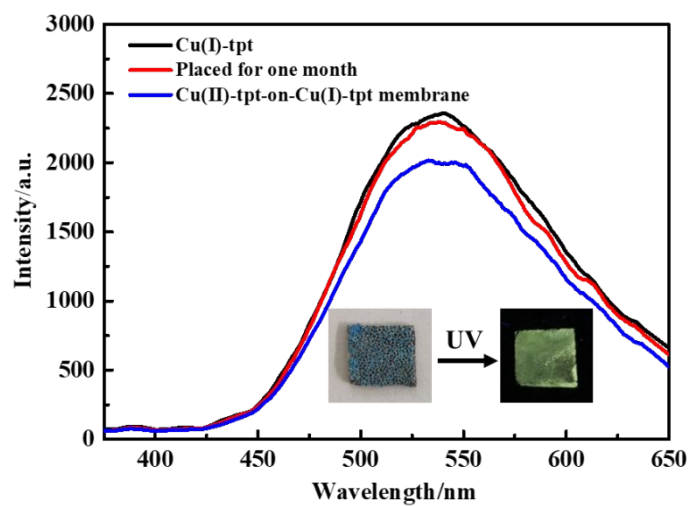

**Figure S8.** Fluorescence spectra of the Cu(I)-tpt and Cu(II)-tpt-on-Cu(I)-tpt membrane.

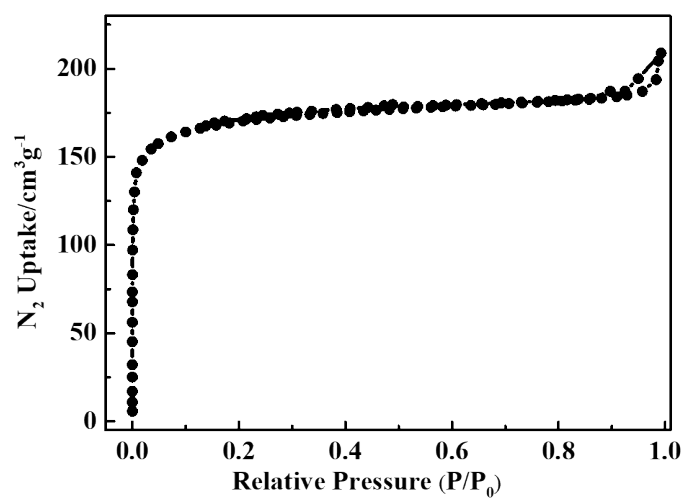

**Figure. S9:** N<sub>2</sub> adsorption and desorption isotherms of Cu(II)-tpt.

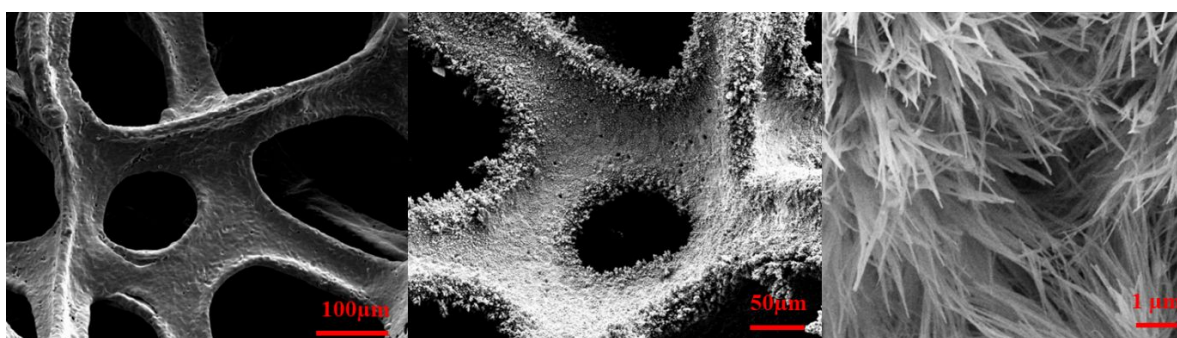

**Figure S10.** The SEM image of copper foam, electrodeposited copper foam and Cu<sub>2</sub>O nanostructure arrays on copper foam.

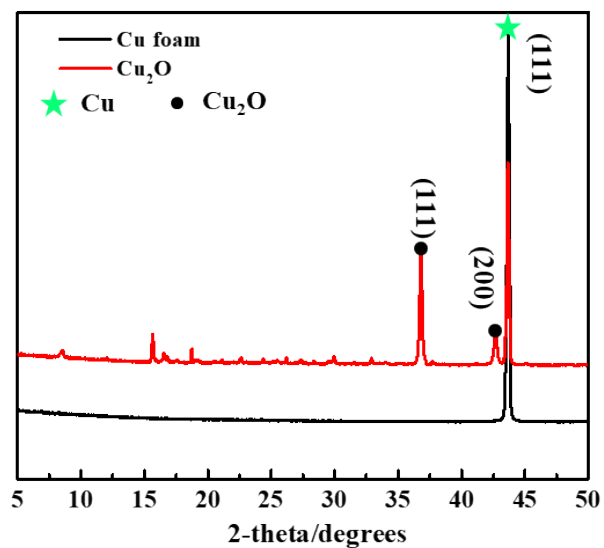

**Figure S11.** The PXRD pattern of Cu foam and  $\text{Cu}_2\text{O}$ .

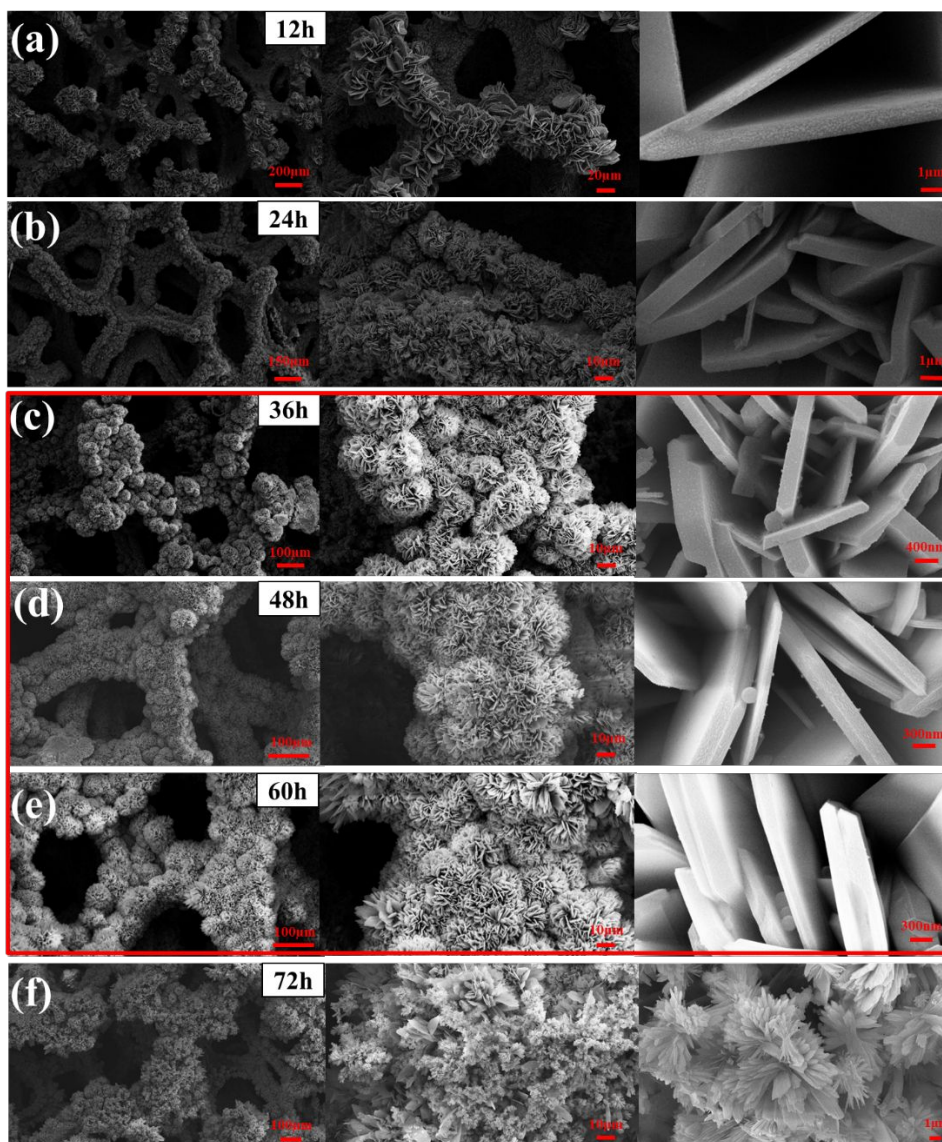

**Figure S12.** SEM images of synthesized **Cu(I)-tpt** layer for different time periods of in situ solvothermal synthesis: (a) 12 h; (b) 24 h; (c) 36 h; (d) 48 h; (e) 60 h; (f) 72h.

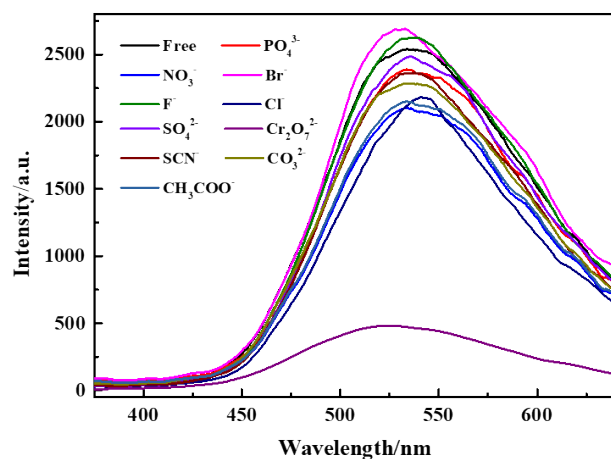

**Figure S13.** Emission spectra of Cu(II)-tpt-on-Cu(I)-tpt membrane under 10 kinds of anions aqueous solutions.

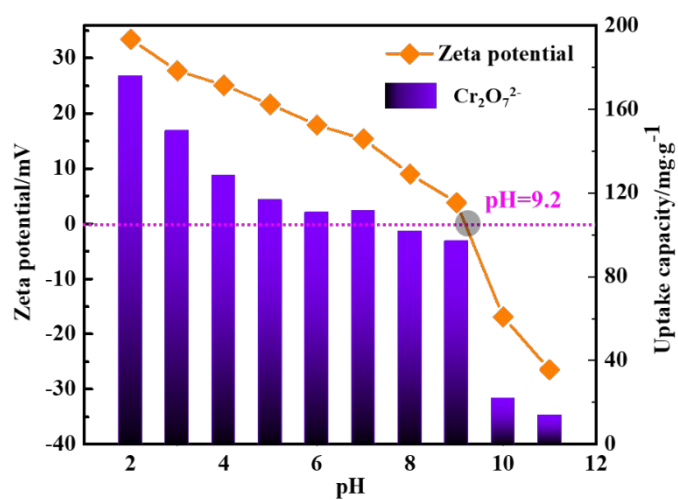

**Figure S14.** The adsorption performance of  $\text{Cr}_2\text{O}_7^{2-}$  on Cu(II)-tpt-on-Cu(I)-tpt membrane at different solution pH and the zeta potential of Cu(II)-tpt.

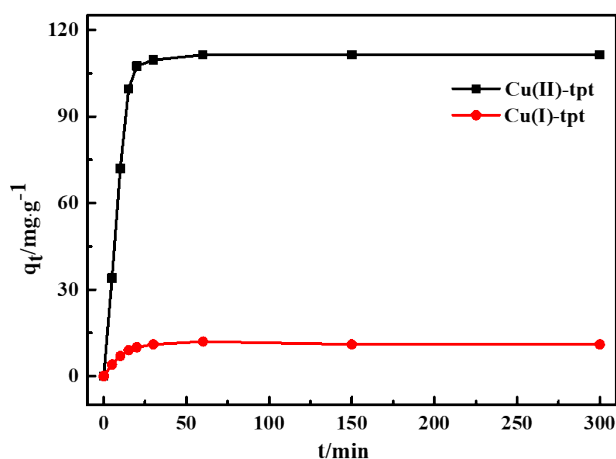

**Figure S15.** Kinetic curve of Cu(I)-tpt and Cu(II)-tpt toward  $\text{Cr}_2\text{O}_7^{2-}$  (40 mg L<sup>-1</sup>)

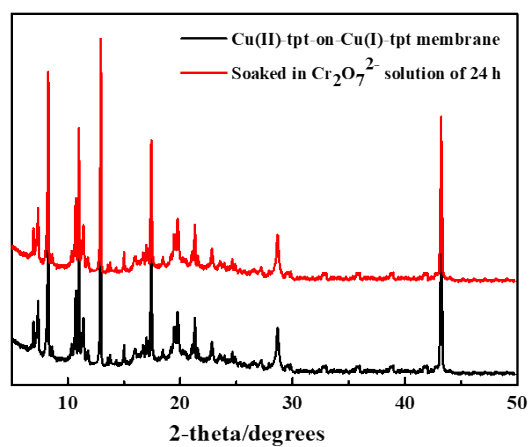

**Figure S16.** PXRD patterns of **Cu(II)-tpt-on-Cu(I)-tpt membrane** before and after soaked in  $\text{Cr}_2\text{O}_7^{2-}$ .

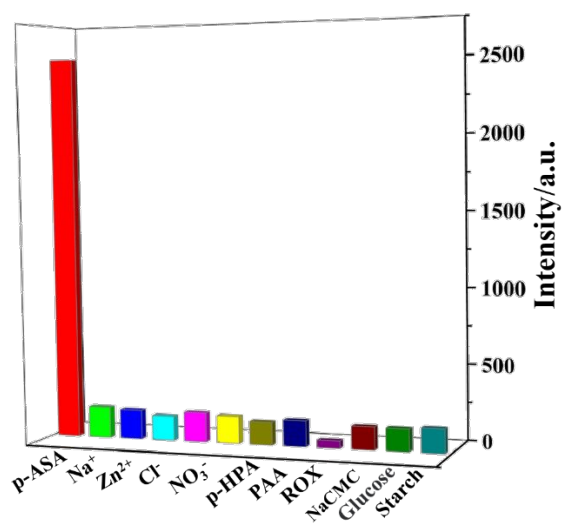

**Figure S17.** The response of **Cu(II)-tpt-on-Cu(I)-tpt membrane** to different substances.

**Table S1.** Crystal data and structure refinement parameters of **Cu(I)-tpt**

| Identification code        | <b>Cu(I)-tpt</b>                               |
|----------------------------|------------------------------------------------|
| Empirical formula          | CuN <sub>7</sub> C <sub>9</sub> H <sub>6</sub> |
| CCDC                       | 1994836                                        |
| Formula mass               | 275.75                                         |
| Crystal system             | Monoclinic                                     |
| Space group                | P2 1/c                                         |
| a (Å)                      | 9.5702(4)                                      |
| b (Å)                      | 10.7184(4)                                     |
| c (Å)                      | 9.0910(3)                                      |
| α (°)                      | 90.00                                          |
| β (°)                      | 92.5770(10)                                    |
| γ (°)                      | 90.00                                          |
| V (Å <sup>3</sup> )        | 931.59(6)                                      |
| Z                          | 4                                              |
| Dc/(g cm <sup>-3</sup> )   | 1.966                                          |
| μ (Mo Kα)/mm <sup>-1</sup> | 2.329                                          |
| F(000)                     | 522                                            |
| θ range (°)                | 2.85 – 30.53                                   |
| Limiting indices           | –13 ≤ h ≤ 12<br>–12 ≤ k ≤ 15<br>–11 ≤ l ≤ 12   |
| Data/Restraints/Parameters | 2839 / 0 / 154                                 |
| GOF on F <sup>2</sup>      | 0.919                                          |
| R1a                        | 0.0380                                         |
| wR2b                       | 0.1114                                         |
| R1                         | 0.0548                                         |
| wR2                        | 0.1296                                         |

$$^a R_1 = \sum ||F_o| - |F_c|| / \sum |F_o|; ^b wR_2 = [\sum [w (F_o^2 - F_c^2)^2] / \sum [w (F_o^2)^2]]^{1/2}.$$

**Table S2.** Selected bond lengths (Å) and bond angles (°) for **Cu(I)-tpt**

| <b>Cu(I)-tpt</b> |           |                 |            |
|------------------|-----------|-----------------|------------|
| Cu(1)-N(7)       | 1.977(2)  | Cu(1)-N(3)      | 2.0790(19) |
| Cu(1)-N(5)       | 2.087(2)  | Cu(1)-N(1)      | 2.100(2)   |
| N(7)-Cu(1)-N(3)  | 113.37(8) | N(7)-Cu(1)-N(5) | 128.27(9)  |
| N(3)-Cu(1)-N(5)  | 100.23(8) | N(7)-Cu(1)-N(1) | 115.37(9)  |
| N(3)-Cu(1)-N(1)  | 100.96(8) | N(5)-Cu(1)-N(1) | 94.08(9)   |

**Table S3.** Crystal data and structure refinement parameters of **Cu(II)-tpt**

| Identification code                     | <b>Cu(II)-tpt</b>                                                   |
|-----------------------------------------|---------------------------------------------------------------------|
| Empirical formula                       | CuN <sub>64</sub> C <sub>64</sub> O <sub>8</sub> H <sub>80</sub>    |
| CCDC                                    | 2022584                                                             |
| Formula mass                            | 2128.12                                                             |
| Crystal system                          | Monoclinic                                                          |
| Space group                             | C2/c                                                                |
| a (Å)                                   | 22.834(2)                                                           |
| b (Å)                                   | 14.4584(12)                                                         |
| c (Å)                                   | 6.9109(7)                                                           |
| $\alpha$ (°)                            | 90.00                                                               |
| $\beta$ (°)                             | 95.391(4)                                                           |
| $\gamma$ (°)                            | 90.00                                                               |
| V (Å <sup>3</sup> )                     | 2271.5(4)                                                           |
| Z                                       | 4                                                                   |
| Dc/(g cm <sup>-3</sup> )                | 1.556                                                               |
| $\mu$ (Mo K $\alpha$ )/mm <sup>-1</sup> | 1.013                                                               |
| F(000)                                  | 1092                                                                |
| $\theta$ range (°)                      | 2.82 – 28.27                                                        |
| Limiting indices                        | –3 $0 \leq h \leq 29$<br>–19 $\leq k \leq 19$<br>–9 $\leq l \leq 6$ |
| Data/Restraints/Parameters              | 2815 / 0 / 159                                                      |
| GOF on F <sup>2</sup>                   | 1.221                                                               |
| R1a                                     | 0.0695                                                              |
| wR2b                                    | 0.1879                                                              |
| R1                                      | 0.0999                                                              |
| wR2                                     | 0.2070                                                              |

$$^a R_1 = \sum ||F_o| - |F_c|| / \sum |F_o|; ^b wR_2 = [\sum [w (F_o^2 - F_c^2)^2] / \sum [w (F_o^2)^2]]^{1/2}.$$

**Table S4.** Selected bond lengths (Å) and bond angles (°) for **Cu(II)-tpt**

| <b>Cu(I)-tpt</b> |            |                 |            |
|------------------|------------|-----------------|------------|
| Cu(1)-N(7)       | 2.014(3)   | Cu(1)-N(3)      | 1.999(3)   |
| Cu(1)-N(2)       | 2.577(4)   |                 |            |
| N(3)-Cu(1)-N(3)  | 89.65(19)  | N(3)-Cu(1)-N(7) | 90.39(14)  |
| N(3)-Cu(1)-N(7)  | 90.40(14)  | N(7)-Cu(1)-N(7) | 90.8(2)    |
| N(3)-Cu(1)-N(7)  | 171.52(14) | N(3)-Cu(1)-N(2) | 93.57(12)  |
| N(3)-Cu(1)-N(2)  | 85.73(13)  | N(7)-Cu(1)-N(2) | 85.80(13)  |
| N(7)-Cu(1)-N(2)  | 94.89(13)  | N(3)-Cu(1)-N(2) | 85.73(13)  |
| N(3)-Cu(1)-N(2)  | 93.57(12)  | N(2)-Cu(1)-N(2) | 179.01(15) |

**Table S5.** The parameters of pseudo-first-order kinetic, pseudo-second-order kinetic, and intraparticle diffusion kinetic of  $\text{Cr}_2\text{O}_7^{2-}$  adsorption.

| C (mg/L) | pseudo-first-order |                |        |
|----------|--------------------|----------------|--------|
|          | $q_e(\text{mg/g})$ | $K_1$          | $R^2$  |
| 20       | 48.32±0.25         | 0.13699±0.0032 | 0.9578 |
| 40       | 131.37±0.96        | 0.15145±0.0009 | 0.9552 |
| 60       | 209.98±1.02        | 0.09923±0.0009 | 0.9614 |

  

| C (mg/L) | pseudo-second-order |                 |        |
|----------|---------------------|-----------------|--------|
|          | $q_e(\text{mg/g})$  | $K_2$           | $R^2$  |
| 20       | 59.52±0.31          | 0.00877±0.0002  | 0.9997 |
| 40       | 113.38±0.92         | 0.00229±0.00002 | 0.9985 |
| 60       | 174.21±1.00         | 0.00073±0.00002 | 0.9976 |

**Table S6.** Different ratio of two MOFs in **Cu(II)-tpt in Cu(II)-tpt-on-Cu(I)-tpt membrane** and the LOD of p-ASA.

|                   | <b>Cu(I)-tpt</b><br>$M_I/\text{g}$ | <b>Cu(II)-tpt</b><br>$M_{II}/\text{g}$ | $M_I : M_{II}$ | $C(\text{Cr}_2\text{O}_7^{2-})$<br>$/\text{mg L}^{-1}$ | <b>LOD(p-ASA)</b><br>$/\mu\text{g L}^{-1}$ |
|-------------------|------------------------------------|----------------------------------------|----------------|--------------------------------------------------------|--------------------------------------------|
| <b>Membrane 1</b> | 0.0374                             | 0.0054                                 | 6.93:1         | 3.0                                                    | 0.1068                                     |
| <b>Membrane 2</b> | 0.0379                             | 0.0098                                 | 3.87:1         | 2.5                                                    | 0.0863                                     |
| <b>Membrane 3</b> | 0.0354                             | 0.0174                                 | 2.03:1         | 2.0                                                    | 0.0556                                     |
| <b>Membrane 4</b> | 0.0383                             | 0.0368                                 | 1.04:1         | 2.0                                                    | 0.0572                                     |
| <b>Membrane 5</b> | 0.0376                             | 0.0744                                 | 1:1.98         | 1.5                                                    | 0.0514                                     |
| <b>Membrane 6</b> | 0.0368                             | 0.1137                                 | 1:3.09         | /                                                      | /                                          |
